# Supplementary material for: Membrane lipid physiology and toxin catabolism underlie ethanol and acetic acid tolerance inDrosophila melanogaster
Source: Oxford University Press journal article supplement (doi:10.1242/jeb.02448), 2006-09-19
Supplement: jeb02448tables.pdf [file jeb02448tables.pdf]

Table S1. Primers, probes and MgCl<sub>2</sub> concentrations used to assay gene expression by qRT-PCR

| Protein                                      | EC        | Gene (CG)                     | F primer (5'–3')                                 | Probe (5'Fam – 3'MGB) | MgCl <sub>2</sub> (mmol l <sup>-1</sup> )* |
|----------------------------------------------|-----------|-------------------------------|--------------------------------------------------|-----------------------|--------------------------------------------|
|                                              |           |                               | R primer (5'–3')                                 |                       |                                            |
| Acetyl-CoA synthetase                        | 6.2.1.1   | <i>AcCoAS</i><br>(9390)       | CGGAAACCGGTGGTCATG<br>CCGCACTCATCCAGCAAAG        | CGGGATCTGCTTCATT      | 3.75                                       |
|                                              |           | CG6432                        | TCCGCACGCTTTACTTTCAA<br>GATATAGCCACGTTTCGTCCTTGT | AGTTTCCGGGTTACTATGA   | 3.50                                       |
|                                              |           | CG8732                        | GCCTGGGTGATAAGTCCTTTGA<br>CGGGAACCTCATATTTTTGCA  | TGCGCGGAAATGTAAA      | 3.50                                       |
| Acetaldehyde<br>dehydrogenase                | 1.2.1.3   | <i>Aldh</i><br>(3752)         | GTCCAGCCCACGGTGTTT<br>GGCGGCCAATCCGTACT          | TTGCAAGGGAGGAGAT      | 3.50                                       |
| Alcohol dehydrogenase                        | 1.1.1.1   | <i>Adh</i><br>(3481)          | GACCAACAAGAACGTGATTTTCG<br>GGGTTCTCAATGCGGTCGA   | CTGAAGAACCTGGTGATC    | 3.25                                       |
| CDP-ethanolamine<br>diglyceride transferase  | 2.7.8.1   | <i>Cdpet</i><br>(6016)        | CCGCCAAGGTCACCAATAA<br>CGTGAACCACAGTAGCCAGATCT   | TGATCGCTCACATGAC      | 3.50                                       |
| Fatty acid desaturase                        | 1.14.19.1 | <i>desat1</i><br>(5887)       | CGCCTTCGGTTACCTCCAT<br>CCTAGGCCAGAAATGACGTATAGAA | CGTGCATCTTAGCTTATT    | 3.50                                       |
| Phosphoethanolamine<br>cytidylyltransferase  | 2.7.7.14  | <i>Pect</i><br>(5547)         | AGCGCGTGCTCAGTGTTTT<br>GCGTCCATGACAGACAACATC     | CCTGCAAGTTTGTCAAT     | 3.50                                       |
| Phosphatidate<br>phosphatase                 | 3.1.3.4   | <i>wunen</i><br>(8804)        | TGGCAGGATCGCTTATIGG<br>GCTTCGTGTTGGGCTTTTGA      | TCGTGGCCAACAT         | 3.75                                       |
| Phospholipase D                              | 3.1.4.4   | <i>Plid</i><br>(12110)        | CGCATGAATGGCAAGAAGTATC<br>CCGACTGGAACCTTCGCTTT   | AGAACACTTAGGCCTCC     | 3.50                                       |
| Ribosomal protein L32                        | NA        | <i>RpL32</i><br>(7939)        | AGGCCCAAGATCGTGAAGAA<br>GACGCACTCTGTTGTCGATACC   | AGCTGTGCGACAAAT       | 3.50                                       |
| Sphinganine-1-phosphate<br>lyase             | 4.1.2.27  | <i>Sply</i><br>(8946)         | CCTGAATGCGCTGCAGTTT<br>CGACTCCGGGCTGTGTGT        | CCATCTGGTATCCACC      | 3.50                                       |
| Sterol regulatory element<br>binding protein | NA        | <i>Srebp/HLH106</i><br>(8522) | GAGAAGTTCAGACCGATTTGAA<br>GCGACAAACTGCCTCGTACA   | TACCGAACGCCCAATC      | 3.50                                       |

\*Final concentration of MgCl<sub>2</sub> in a 50 ml reaction containing 200 μmol l<sup>-1</sup> dATP, dCTP and dGTP, 400 μmol l<sup>-1</sup> dUTP, 900 nmol l<sup>-1</sup> each primer, 250 nmol l<sup>-1</sup> probe and 0.025 i.u./μl AmpliTaq Gold; PCR, 10 min hold at 95°C followed by at least 30 cycles of 15 s at 95°C and 60 s at 60°C.

Table S2. *Adh* genotypes for the F/S amino acid and  $\nabla 1$  indel polymorphisms

|                               |                | Innisfail   |             |             |             |     |             |     |             |     |  |
|-------------------------------|----------------|-------------|-------------|-------------|-------------|-----|-------------|-----|-------------|-----|--|
| Line                          | 2              | 31          | 55          | 65A         | 72B         | 75A | 77B         | 78A | 80B         | 90  |  |
| F/S*                          | H <sup>‡</sup> | S           | S           | S           | S           | H   | H           | H   | S           | H   |  |
| $\nabla 1f/\nabla 1s^\dagger$ | H              | $\nabla 1s$ | $\nabla 1s$ | $\nabla 1s$ | $\nabla 1s$ | H   | H           | H   | $\nabla 1s$ | H   |  |
|                               |                | Tasmania    |             |             |             |     |             |     |             |     |  |
| Line                          | 28             | 31          | 55          | 67          | 79          | 81  | 125         | 148 | 151         | 187 |  |
| F/S                           | F              | F           | H           | F           | H           | H   | F           | H   | F           | H   |  |
| $\nabla 1f/\nabla 1s$         | $\nabla 1f$    | $\nabla 1f$ | H           | $\nabla 1f$ | H           | H   | $\nabla 1f$ | H   | $\nabla 1f$ | H   |  |

\*Forward primer, agctccctggcggttaagttgat; Reverse primer, acgagggctgggtgggatgag; PCR concentrations, 1.5 mmol l<sup>-1</sup> MgCl<sub>2</sub>, 0.2 mmol l<sup>-1</sup> dNTPs, 0.3 μmol l<sup>-1</sup> each primer, 0.02 i.u./μl *Taq*; PCR, 30 cycles of 50 s at 94°C, 50 s at 65°C and 30 s at 72°C; restriction digest, 1 μg of PCR product with 2.5 i.u. of *Hpy*CH4IV at 37°C for 1.5 h.

<sup>†</sup>Common reverse primer, agggctccgttagttgtgtgttc, in combination with the control forward primer, gccaaagtgcggaaataaaatgacag, and either the  $\nabla 1f$  forward primer, caagcatcaggcatataatata, or the  $\nabla 1s$  forward primer, 5'-caagcatcaggcatagttgggc;  $\nabla 1f$  PCR concentrations, 2.5 mmol l<sup>-1</sup> MgCl<sub>2</sub>, 0.2 mmol l<sup>-1</sup> dNTPs, 0.3 μmol l<sup>-1</sup> control forward primer, 0.3 μmol l<sup>-1</sup>  $\nabla 1f$  forward primer, 0.6 μmol l<sup>-1</sup> reverse primer and 0.025 i.u./μl *Taq*;  $\nabla 1f$  PCR, 30 cycles of 50 s at 94°C, 50 s at 58°C and 50 s at 72°C;  $\nabla 1s$  PCR concentrations, 4.5 mmol l<sup>-1</sup> MgCl<sub>2</sub>, 0.2 mmol l<sup>-1</sup> dNTPs, 0.3 μmol l<sup>-1</sup> control forward primer, 0.3 μmol l<sup>-1</sup>  $\nabla 1s$  forward primer, 0.6 μmol l<sup>-1</sup> reverse primer and 0.015 i.u./μl *Taq*;  $\nabla 1s$  PCR, 30 cycles of 50 s at 94°C, 50 s at 68°C and 50 s at 72°C.

<sup>‡</sup>H, both alleles were present in a sample of 20 flies.
