# Supplementary figures and images for: Membrane lipid physiology and toxin catabolism underlie ethanol and acetic acid tolerance inDrosophila melanogaster
Source: Oxford University Press journal article supplement (doi:10.1242/jeb.02448), 2006-09-19

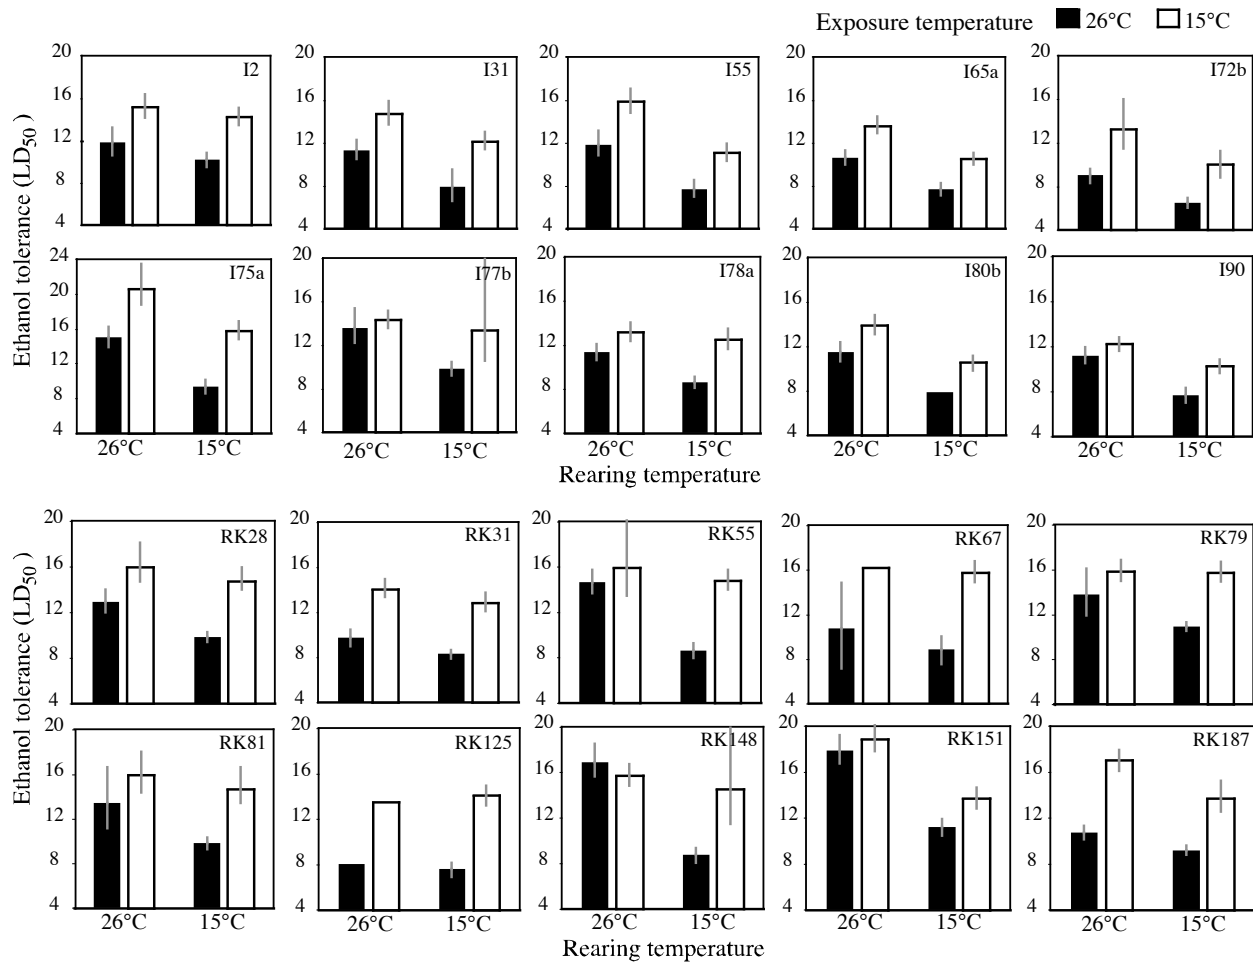

Supplement: jeb02448figs1.pdf [file jeb02448figs1.pdf]

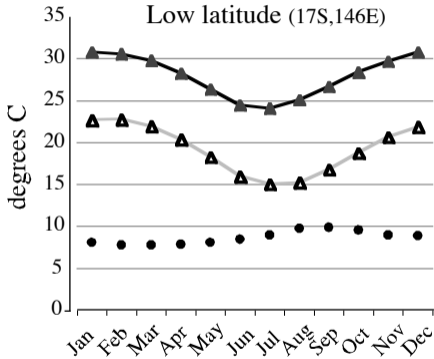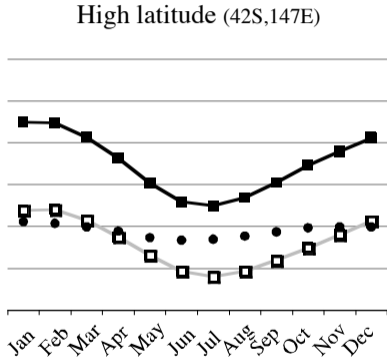

Supplement: jeb02448figs2.pdf [file jeb02448figs2.pdf]
